# Supplementary material
Source: MDPI journal article supplement (https://www.mdpi.com/2624-8549/5/1/30)
Supplement: s1 [file s1]

Archive with 1 entries (1 files):
- chemistry-2220335-supplementary.pdf
