# Supplementary material
Source: MDPI journal article supplement (https://www.mdpi.com/2624-8549/5/1/30)
Supplement: s1 [file s1 › chemistry-2220335-supplementary.pdf]

## Vapor-phase oxidant-free dehydrogenation of 2,3- and 1,4-butanediol over Cu/SiO<sub>2</sub> catalyst prepared by crown-ether-assisted impregnation

Enggah Kurniawan, Shuya Hosaka, Yasuhiro Yamada, and Satoshi Sato\*

Graduate School of Engineering, Chiba University, Yayoi, Inage, Chiba 263-8522, Japan

\* Correspondence: satoshi@faculty.chiba-u.jp; Tel.: +81-43-290-3377

### Experimental

#### *Estimation of Cu surface area*

In a classical measurement of Cu dispersion ( $D$ ), the consumption of N<sub>2</sub>O has been measured by pulse N<sub>2</sub>O titration using chromatographic separation [S1,S2] and monitoring TCD signal without separating N<sub>2</sub>O and N<sub>2</sub> [S3]. Although it had been believed that only the surface of Cu particles could be oxidized by N<sub>2</sub>O, oxidation of bulk Cu particles actually proceeded even at room temperature during the N<sub>2</sub>O oxidation [S4,S5]. Thus, the distinction of oxidation between the surface and the bulk of Cu particles is necessary to estimate the Cu surface area. One of the authors has previously developed a back titration of a copper surface oxidized with N<sub>2</sub>O for the estimation of copper surface area as well as  $D$  value using a combination of a temperature-programmed reduction (TPR) and a diffusion theory of oxide species in bulk Cu particles [S4]. It is preferable that the oxidation of Cu particles through N<sub>2</sub>O exposure is operated at a low temperature of 50 °C or lower because of the low diffusion speed in the bulk oxidation of Cu particles [S1]. The procedure of the experiment using a self-made apparatus equipped with an N<sub>2</sub>O flow line described in the previous paper [S4] was as follows:

1. At first, a TPR profile was obtained by reducing the copper oxide of the unreduced catalyst with a mixture of H<sub>2</sub>/N<sub>2</sub> (=1/9) at a flow rate of 10 cm<sup>3</sup> min<sup>-1</sup>, while the temperature was increased from room temperature to 300 °C at a heating rate of 10 °C min<sup>-1</sup>. Afterward, the temperature was kept at 300 °C for 1 h. The total number of Cu ( $A_1$ ) is the peak area of this TPR profile.
2. The metallic Cu produced in the previous step was oxidized by N<sub>2</sub>O gas at a flow rate of 3.0 cm<sup>3</sup> min<sup>-1</sup> together with a H<sub>2</sub>/N<sub>2</sub> (=1/9) mixture of 10 cm<sup>3</sup> min<sup>-1</sup> at 50 °C for a prescribed time ( $t$ ).
3. The back titration of the oxidized surface was performed by conducting the TPR in which the oxidized Cu species obtained in step 2 was reduced with the H<sub>2</sub>/N<sub>2</sub> (=1/9) mixture of 10 cm<sup>3</sup> min<sup>-1</sup>, while the temperature was increased up to 250 °C. The amount of surface Cu ( $A_2$ ) is the peak area of this TPR. The Cu<sub>2</sub>O fraction,  $D^*$ , at an oxidation time ( $t$ ) was then obtained using the following equation:

$$D^* = \frac{2A_2}{A_1}$$

Several  $D^*$  values were obtained by repeating the above steps 2 and 3 with different  $t$  several times. The TPR profiles for the back titration of  $\text{Cu}_2\text{O}$  formed by  $\text{N}_2\text{O}$  oxidation, as shown in Fig. 2 of Ref. [S4].

Because the oxidation of Cu particles proceeded not only on the surface but also in the bulk of Cu particles, we removed the contribution of bulk oxidation by using Fick's law. According to Fick's law, the apparent dispersion,  $D^*$ , is expressed as the total of true dispersion,  $D$ , and bulk oxidation, which is represented as a product of the function of time,  $t^{1/2}$ , and proportional coefficient,  $B$ . The correlation of those quantities is expressed by the following equation:

$$D^* = D + B(t)^{1/2}$$

Therefore, by plotting  $D^*$  against  $t^{1/2}$ , the true dispersion of  $D$  could be obtained as the intercept, as shown in Figs. 4 and 5 of Ref. [S4]. The Cu metal surface area per unit weight of catalyst,  $SA_{\text{Cu}}$ , was calculated as the following equation:  $SA_{\text{Cu}} (\text{m}^2 \text{ g}_{\text{cat}}^{-1}) = D N_A C_{\text{Cu}} / 100 N_{\text{Cu}} W_{\text{Cu}}$ , where  $N_A$ ,  $C_{\text{Cu}}$ ,  $N_{\text{Cu}}$  and  $W_{\text{Cu}}$  are Avogadro constant, Cu content in the catalyst (wt.-%), number of surface Cu atoms in unit surface area,  $1.7 \times 10^{19} \text{ m}^{-2}$ , and atomic weight of Cu ( $63.5 \text{ g mol}^{-1}$ ), respectively [S2].

[S1] Dvořák, B.; Pašek, J.; Determination of the specific copper surface area by chromatographic technique, *J. Catal.* **1970**, 18, 108–114.

[S2] Evans, J.W.; Wainwright, M.S.; Bridgewater, A.J.; Young, D.J.; On the determination of copper surface area by reaction with nitrous oxide, *Appl. Catal.* **1983**, 7, 75–83.

[S3] Chinchin, G.C.; Hay, C.M.; Vandervel, H.D.; Waugh, K.C.; The measurement of copper surface areas by reactive frontal chromatography, *J. Catal.* **1987**, 103, 79–86.

[S4] Sato, S.; Takahashi, R.; Sodesawa, T.; Yuma, K.I.; Obata, Y.; Distinction between surface and bulk oxidation of Cu through  $\text{N}_2\text{O}$  decomposition, *J. Catal.* **2000**, 196, 195–199.

[S5] Jensen, J.R.; Johannessen, T.; Livbjerg, H.; An improved  $\text{N}_2\text{O}$ -method for measuring Cu-dispersion, *Appl. Catal. A Gen.* **2004**, 266, 117–122.

[S6] Hosaka, S.; Kurniawan, E.; Yamada, Y.; Sato, S.; Vapor-phase dehydrogenation of 1-decanol to decanal over  $\text{Cu/SiO}_2$  catalyst prepared by organic additives-assisted impregnation, *Appl. Catal. A Gen.* **2023**, 653, 119079.

Table S1. Detail quantity for the preparation of Cu/SiO<sub>2</sub> catalysts

| Catalyst                 | Cu content<br>/ wt% | Cu(NO <sub>3</sub> ) <sub>2</sub> ·3H <sub>2</sub> O<br>/ g | Organic<br>additive / g | SiO <sub>2</sub> support<br>/ g |
|--------------------------|---------------------|-------------------------------------------------------------|-------------------------|---------------------------------|
| None-Cu/SiO <sub>2</sub> | 2.00                | 0.152                                                       | -                       | 1.96                            |
|                          | 5.00                | 0.380                                                       | -                       | 1.90                            |
|                          | 10.0                | 0.760                                                       | -                       | 1.80                            |
|                          | 15.0                | 1.14                                                        | -                       | 1.70                            |
|                          | 20.0                | 1.52                                                        | -                       | 1.60                            |
| 12C4-Cu/SiO <sub>2</sub> | 2.00                | 0.152                                                       | 0.110                   | 1.96                            |
|                          | 5.00                | 0.380                                                       | 0.277                   | 1.90                            |
|                          | 10.0                | 0.760                                                       | 0.555                   | 1.80                            |
|                          | 15.0                | 1.14                                                        | 0.832                   | 1.70                            |
|                          | 20.0                | 1.52                                                        | 1.11                    | 1.60                            |
| 15C5-Cu/SiO <sub>2</sub> | 2.00                | 0.152                                                       | 0.139                   | 1.96                            |
|                          | 10.0                | 0.760                                                       | 0.693                   | 1.80                            |
| 18C6-Cu/SiO <sub>2</sub> | 2.00                | 0.152                                                       | 0.166                   | 1.96                            |
|                          | 10.0                | 0.760                                                       | 0.831                   | 1.80                            |
| CA-Cu/SiO <sub>2</sub>   | 2.00                | 0.152                                                       | 0.132                   | 1.96                            |
|                          | 10.0                | 0.760                                                       | 0.661                   | 1.80                            |
| TEG-Cu/SiO <sub>2</sub>  | 10.0                | 0.760                                                       | 0.473                   | 1.80                            |

Table S2.  $SA_{Cu}$  values of Cu/SiO<sub>2</sub> catalysts used in Figs. 5 and 7.

| Organic additive | Cu content<br>/wt.-% | Dispersion,<br>$D^a$ | $SA_{Cu}^a$<br>/m <sup>2</sup> g <sub>cat</sub> <sup>-1</sup> | $D_{Cu}^a$<br>/nm |
|------------------|----------------------|----------------------|---------------------------------------------------------------|-------------------|
| None             | 5.0                  | 0.166                | 4.62                                                          | 7.2               |
|                  | 10                   | 0.203                | 11.3                                                          | 5.9               |
|                  | 15                   | 0.237                | 19.8                                                          | 5.1               |
|                  | 20                   | 0.0904               | 10.1                                                          | 13.3              |
| 12C4             | 5.0                  | 0.434                | 12.1                                                          | 2.8               |
|                  | 10                   | 0.468                | 26.1                                                          | 2.7               |
|                  | 15                   | 0.476                | 39.8                                                          | 2.5               |
|                  | 20                   | 0.502                | 56.0                                                          | 2.4               |
| 15C5             | 10                   | 0.478                | 26.6                                                          | 2.5               |
| 18C6             | 10                   | 0.316                | 17.6                                                          | 3.8               |
| TEG              | 10                   | 0.450                | 25.1                                                          | 2.7               |
| CA               | 10                   | 0.302                | 16.8                                                          | 4.0               |

<sup>a</sup> Estimated by N<sub>2</sub>O titration, and the data are cited from Ref. [S6]. A mean particle size of Cu,  $D_{Cu}$ , was calculated by the following equation:  $D_{Cu} = 6 C_{Cu}/100 d SA_{Cu}$ , assuming that the Cu particles are spherical or cubic, where  $C_{Cu}$  and  $d$  are the Cu content (wt.-%) and the density of Cu ( $d = 8.96$  g cm<sup>-3</sup>), respectively.
